# Supplementary material for: CIRI: an efficient and unbiased algorithm for de novo circular RNA identification
Source: PubMed Central journal article supplement (PMC4316645; doi:10.1186/s13059-014-0571-3), 2015-01-13
Supplement: 13059_2014_571_MOESM1_ESM.pdf [file 13059_2014_571_MOESM1_ESM.pdf]

## Supplementary Table 1. Candidates circRNAs for experimental validation.

| gene:start_exon end_exon | chr   | start position | end position | region in genome | # junction reads | PCC signal types | detected in 15 cell types <sup>1</sup> |    | detected in 4 cell types <sup>2</sup> |     | outward-facing primer PCR validation |         |
|--------------------------|-------|----------------|--------------|------------------|------------------|------------------|----------------------------------------|----|---------------------------------------|-----|--------------------------------------|---------|
|                          |       |                |              |                  |                  |                  | CIRI                                   | PG | CIRI                                  | NAT | Total RNA                            | RNase R |
| PHC3-011:exon5 exon6     | chr3  | 169863211      | 169867032    | exonic           | 39               | 25_27_0          | y                                      | y  | y                                     | y   | y                                    | y       |
| HIPK3-003:exon2 exon2    | chr11 | 33307959       | 33309057     | exonic           | 208              | 53_53_2          | y                                      | y  | y                                     | y   | y                                    | y       |
| NFATC3-006:exon2 exon3   | chr16 | 68155890       | 68160513     | exonic           | 61               | 27_29_1          | y                                      | y  | y                                     | y   | y                                    | y       |
| POLR2A-001:exon9 exon10  | chr17 | 7402358        | 7402810      | exonic           | 33               | 19_24_1          | y                                      | y  | y                                     | y   | y                                    | y       |
| FAM120A-004:exon2 exon5  | chr9  | 96233423       | 96261168     | exonic           | 86               | 34_37_1          | y                                      | y  | y                                     | y   | y                                    | y       |
| CRIM1-001:exon3 exon4    | chr2  | 36668401       | 36669878     | exonic           | 66               | 28_28_2          | y                                      | y  | n                                     | n   | y                                    | y       |
| CRIM1-001:exon2 exon4    | chr2  | 36623757       | 36669878     | exonic           | 46               | 17_21_0          | y                                      | y  | n                                     | n   | y                                    | y       |
| PDCD11-001:exon26 exon27 | chr10 | 105197772      | 105198565    | exonic           | 32               | 16_20_7          | y                                      | y  | y                                     | y   | y                                    | y       |
| SFMBT2:exon5 exon7       | chr10 | 7318854        | 7327916      | exonic           | 256              | 58_58_5          | y                                      | y  | y                                     | y   | y                                    | y       |
| SFMBT2:exon5 exon9       | chr10 | 7285520        | 7327916      | exonic           | 68               | 31_30_0          | y                                      | y  | n                                     | n   | y                                    | y       |
| ANKRD36BP2:exon4 exon12  | chr2  | 89082251       | 89092011     | exonic           | 46               | 8_17_18          | n                                      | n  | y                                     | n   | y                                    | y       |
| RSRC1:exon2 exon3        | chr3  | 157839892      | 157841780    | exonic           | 125              | 43_45_3          | y                                      | y  | y                                     | y   | y                                    | y       |
| EXOC6B:exon3 exon6       | chr2  | 72945232       | 72960247     | exonic           | 92               | 36_23_15         | y                                      | y  | n                                     | n   | y                                    | y       |
| VRK2:exon6 exon10        | chr2  | 58311224       | 58316858     | exonic           | 56               | 14_26_14         | y                                      | n  | n                                     | n   | y                                    | y       |
| MAN1A2:exon2 exon4       | chr1  | 117944808      | 117957453    | exonic           | 64               | 33_33_2          | y                                      | n  | y                                     | y   | y                                    | y       |
| MAN1A2:exon2 exon5       | chr1  | 117944808      | 117963271    | exonic           | 230              | 55_53_6          | y                                      | n  | y                                     | y   | y                                    | y       |
| MAN1A2:exon2 exon3       | chr1  | 117944808      | 117948267    | exonic           | 41               | 25_23_1          | n                                      | y  | y                                     | y   | y                                    | y       |
| MAN1A2:exon2 exon6       | chr1  | 117944808      | 117984947    | exonic           | 58               | 24_24_1          | y                                      | y  | y                                     | y   | y                                    | y       |
| intergenic               | chr5  | 10213603       | 10224173     | intergenic       | 62               | 27_25_2          | y                                      | n  | n                                     | n   | y                                    | y       |
| intergenic               | chr8  | 128152989      | 128186609    | intergenic       | 87               | 37_37_1          | y                                      | n  | n                                     | n   | y                                    | y       |
| BICC1:intron             | chr10 | 60347975       | 60380661     | intronic         | 17               | 12_8_3           | y                                      | n  | n                                     | n   | y                                    | y       |
| MED13L:intron            | chr12 | 116668338      | 116675510    | intronic         | 67               | 27_27_1          | y                                      | n  | y                                     | y   | y                                    | y       |
| MED13L:intron            | chr12 | 116674626      | 116675510    | intronic         | 29               | 11_17_6          | y                                      | n  | n                                     | n   | y                                    | y       |
| BANP:exon8 exon11        | chr16 | 88061089       | 88071617     | exonic           | 69               | 31_11_19         | y                                      | y  | y                                     | n   | y                                    | y       |
| CCAT1                    | chr8  | 128231055      | 128231211    | exonic           | 18               | 13_14_1          | y                                      | n  | n                                     | n   | y                                    | n       |
| DYRK1A:intron            | chr21 | 38792601       | 38794168     | intronic         | 76               | 32_34_4          | y                                      | n  | y                                     | y   | n                                    | n/a     |
| POLR2A-001:exon9 exon10  | chr17 | 7402358        | 7402810      | exonic           | 33               | 19_24_1          | y                                      | n  | y                                     | y   | n                                    | n/a     |
| PRSS53:intron            | chr16 | 31102096       | 31102663     | intronic         | 22               | 15_17_           | y                                      | n  | n                                     | n   | n                                    | n/a     |
| ARID1B:intron            | chr6  | 157357969      | 157406039    | exonic           | 7                | 2_5_3            | y                                      | y  | y                                     | y   | n                                    | n/a     |
| ZCCHC11:exon4 exon7      | chr1  | 52959283       | 52975384     | exonic           | 19               | 8_13_2           | y                                      | n  | n                                     | n   | n                                    | n/a     |
| GSE1:exon2 exon2         | chr16 | 85667520       | 85667738     | exonic           | 146              | 55_51_3          | y                                      | n  | y                                     | n   | n                                    | n/a     |
| DNAH14:exon2 exon10      | chr1  | 225140372      | 225195246    | exonic           | 31               | 19_17_1          | y                                      | y  | n                                     | n   | n                                    | n/a     |
| intergenic               | chr8  | 128231055      | 128239786    | intergenic       | 15               | 14_9_1           | y                                      | n  | n                                     | n   | y                                    | n       |
| ARHGEF12:exon2 exon3     | chr11 | 120276827      | 120278532    | exonic           | 18               | 1_11_10          | y                                      | y  | n                                     | n   | n                                    | n/a     |

<sup>1</sup> The 15 cell types of ENCODE data sets used for circRNA detection in a previous study (Salzman et al., PLoS Genetics, 2013). See Method for detail.

<sup>2</sup> The 4 cell types used for circRNA detection in previous studies (Memczak et al., Nature, 2013; Salzman et al., PLoS One, 2012): CD19+, CD34+, neutrophils and HEK293.

**Supplementary Table 2. Direct comparison of the three algorithms.**

| Algorithm                                     | CIRI                                                                               | find_circ <sup>1</sup>                                                              | segemehl <sup>2</sup>                                                                |
|-----------------------------------------------|------------------------------------------------------------------------------------|-------------------------------------------------------------------------------------|--------------------------------------------------------------------------------------|
| Candidate circRNAs detected                   | 5,533                                                                              | 5,542                                                                               | 18,418                                                                               |
| Candidates with identical colinear exons      | 0                                                                                  | 64(1.2%)                                                                            | 558(3.0%)                                                                            |
| Candidates with two ends from different genes | 21(0.4%)                                                                           | 113(2.0%)                                                                           | 92(0.5%)                                                                             |
| Total junction read counts                    | 38,644                                                                             | 34,804                                                                              | 89,553                                                                               |
| Junction read # per candidate circRNA         | 6.98                                                                               | 6.28                                                                                | 4.86                                                                                 |
| Read depth near the left junction             | 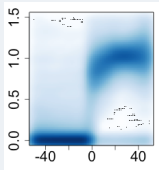  |   |   |
| Read depth near the right junction            |  |  |  |

<sup>1</sup> find\_circ: algorithm used in Memczak et al., Nature, 2013

<sup>2</sup> segemehl: algorithm reported in Hoffmann et al., Genome Biology, 2014

**Supplementary Table 3. Top 10 KEGG enrichment analysis for 966 gene IDs of exonic circRNAs expressed in more than 10 cell types.**

| Pathway Name                                | #Gene | adjP     |
|---------------------------------------------|-------|----------|
| Ubiquitin mediated proteolysis              | 27    | 1.95e-19 |
| Protein processing in endoplasmic reticulum | 26    | 2.85e-16 |
| Metabolic pathways                          | 52    | 1.92e-09 |
| Pathways in cancer                          | 25    | 8.96e-09 |
| Insulin signaling pathway                   | 13    | 1.32e-05 |
| Colorectal cancer                           | 9     | 1.65e-05 |
| Wnt signaling pathway                       | 13    | 2.44e-05 |
| ErbB signaling pathway                      | 10    | 2.76e-05 |
| Prostate cancer                             | 10    | 2.81e-05 |
| Pancreatic cancer                           | 9     | 2.81e-05 |

**Supplementary Table 4. Outward-facing primers of all validated circRNAs.**

| gene:start_exon end_exon  | chr   | start position | end position | outward-facing primer    |                          |
|---------------------------|-------|----------------|--------------|--------------------------|--------------------------|
|                           |       |                |              | F                        | R                        |
| PHC3-011:exon5 exon6      | chr3  | 169863211      | 169867032    | GAGCTTGGCTTGCCGTTAG      | TGTTGTCTCGTCGTCATCGT     |
| HIPK3-003:exon2 exon2     | chr11 | 33307959       | 33309057     | GTTGGATAATCATAGCAGCG     | AGGTCGGTGGATAGTTTCTTT    |
| NFATC3-006:exon2 exon3    | chr16 | 68155890       | 68160513     | ATCGAGCCATTATGAAACTGA    | GGACAGAAGCATTGAGCCAC     |
| POLR2A-001:exon9 exon10   | chr17 | 7402358        | 7402810      | ATGCAGACTTTGACGGGGATG    | GACCATGGGAGAATGCCGAC     |
| FAM120A-004:exon2 exon5   | chr9  | 96233423       | 96261168     | CGACTAGTAAGCCTATGTCAT    | AGTGCATAATCAGAGTCATAC    |
| CRIM1-001:exon3 exon4     | chr2  | 36668401       | 36669878     | CGGACAGCTATGAAACTCAAGTCA | CTGGTTTGCACCTCATAGAGGTC  |
| CRIM1-001:exon2 exon4     | chr2  | 36623757       | 36669878     | CGGACAGCTATGAAACTCAAGTCA | CTGGTTTGCACCTCATAGAGGTC  |
| PDCCD11-001:exon26 exon27 | chr10 | 105197772      | 105198565    | GACGAAAAGCAAAGTAGAAG     | AGCGACAAAAGTCAATACGTT    |
| SFMBT2:exon5 exon7        | chr10 | 7318854        | 7327916      | CGAACCAGTCAAGTCACGTATG   | ATGGCCTCTGAATGGAATGTAC   |
| SFMBT2:exon5 exon9        | chr10 | 7285520        | 7327916      | CGAACCAGTCAAGTCACGTATG   | ATGGCCTCTGAATGGAATGTAC   |
| ANKRD36BP2:exon4 exon12   | chr2  | 89082251       | 89092011     | TCAGCCAAGATAGACAAGAACT   | ATGTCTCCCAGATTGTTGTC     |
| RSRC1:exon2 exon3         | chr3  | 157839892      | 157841780    | GGCATCGATCAAGCAGTAGC     | CGGCTGTATGTTCTACTATCTG   |
| EXOC6B:exon3 exon6        | chr2  | 72945232       | 72960247     | AGCAGTGTGACTACAACAGA     | CTGCACTGAAAACCTCTGGAA    |
| VRK2:exon6 exon10         | chr2  | 58311224       | 58316858     | TGTCCTGCAATTAGGTATCC     | GCCTGAGATCTTCTGAAAATC    |
| MAN1A2:exon2 exon4        | chr1  | 117944808      | 117957453    | TGCTTGGGATAACTATAGGAC    | TGTCATTATCTTCTGGGTCTC    |
| MAN1A2:exon2 exon5        | chr1  | 117944808      | 117963271    | TGCTTGGGATAACTATAGGAC    | TGTCATTATCTTCTGGGTCTC    |
| MAN1A2:exon2 exon3        | chr1  | 117944808      | 117948267    | TGCTTGGGATAACTATAGGAC    | TGTCATTATCTTCTGGGTCTC    |
| MAN1A2:exon2 exon6        | chr1  | 117944808      | 117984947    | TGCTTGGGATAACTATAGGAC    | TGTCATTATCTTCTGGGTCTC    |
| intergenic                | chr5  | 10213603       | 10224173     | GTCTCCACAGTCTTATCTCATT   | CCTACTACTAGGCAAAAAGAA    |
| C10orf90:intron           | chr8  | 128152989      | 128186609    | TAGCTTAGTTCTGCCGTAAGT    | TCACCCGAATGCCAAATGTA     |
| BICC1:intron              | chr10 | 60347975       | 60380661     | GTCCAGTGGGGTTATGAATG     | AGCCTCTCATATTCAGAAAAGG   |
| MED13L:intron             | chr12 | 116668338      | 116675510    | TCTGGTTTGACATCACGACG     | CCTGACTGAATTGGAAAGGAAT   |
| MED13L:intron             | chr12 | 116674626      | 116675510    | CTTGACAGACGGGATGAAACT    | GCTCCGGTGTTCCTGATTT      |
| BANP:exon8 exon11         | chr16 | 88061089       | 88071617     | TACCGAATCAAGCAGAGCATCGA  | AGTCGGATTCTGTGATGCCAAATT |

**Supplementary Table 5. Identified circRNAs in ENCODE data sets.**

The tables can be download at

[http://159.226.116.227/~fangqing/Site/shared/ENCODE\\_xls.zip](http://159.226.116.227/~fangqing/Site/shared/ENCODE_xls.zip)

**Figure S1. Performance of CIRI on simulated data sets.** (A) Sensitivity and FDR of varying coverage of circRNAs; (B) Sensitivity and FDR of varying read length of sequencing data (40bp sequencing data is aligned by BWA-MEM with distinct parameters -k 13, -T 13, while other read length with the only parameter: -T 19); (C) Sensitivity and FDR of varying sized circRNAs; (D) Sensitivity and FDR of varying -k parameter of BWA-MEM; (E) Sensitivity and FDR of CIRI using different max spanning distance settings.

**Figure S2. Performance of CIRI and segemehl on data sets with different read lengths and sequencing coverages simulated by CIRI-simulator.**

**Figure S3. Performance of CIRI and segemehl on simulated data sets with real poly-A<sup>+</sup> data sets as blank background.** (A) Sensitivity and FDR of both tools using default parameter settings; (B) Sensitivity and FDR of segemehl with “F” removed compared with default parameter settings of CIRI; (C) Sensitivity and FDR of segemehl with supporting read counts  $\geq 2$  and  $\geq 3$  compared with default parameter settings of CIRI; (D) Sensitivity and FDR of segemehl with supporting read counts  $\geq 3$  compared with two parameter settings of SE mode of CIRI.

**Figure S4. Experimental validation of exonic circRNAs.** Exons used in circRNAs are shown in colored arrows. The linear fragments across the junction were amplified using a pair of outward-facing primers. (G-I) multiple fragments could be amplified because of the presence of alternatively spliced circRNAs. Scissors indicate the splicing sites, which are flanked by GT-AG signals highlighted in red. Sequencing chromatogram of the PCR product across the junction is shown.

**Figure S5. Experimental validation of intronic and intergenic circRNAs.** ICFs used in circRNAs are shown in hollow arrows. The linear fragments across the junction were amplified using a pair of outward-facing primers. (B, D) multiple fragments could be amplified because of the presence of alternatively spliced circRNAs. Scissors indicate the splicing sites, which are flanked by GT-AG signals highlighted in red. Sequencing chromatogram of the PCR product across the junction is shown.

**Figure S6. PCR validation of one exonic circRNA (chr2:58,311,224|58,316,858, A) and one intronic circRNA (chr10: 60,347,975|60,380,661, B) using one pair of**

**outward primers and two pairs of inward primers (within the circle and out of the circle as control) for each of them in RNase  $-/+$ , genomic DNA and poly-A samples.**

**Figure S7. Reads mapped to the junction of intronic circRNA (chr10: 60,347,975|60,380,661).** Reads with the same color are pair-end reads.

**Figure S8. CIRC can distinguish intronic circRNAs from intronic lariats.** (A) Coverage plot of one exon and three ICFs contained in chr12:116,668,338|116,675,510 in the two samples (red: junction reads identified by CIRC in RNaseR<sup>-</sup>; blue: junction reads identified by CIRC in RNaseR<sup>+</sup>; grey: other reads). Scissors indicate the splicing sites, which are flanked by GT-AG signals highlighted in red. (B) Two circRNAs' structures and split mapping of junction reads. (C) After RNase R treatment, 3' tip of the lariat is digested, and the remaining sequence forms a circle. However, when the junction read is mapped back to the reference sequence, no flanking GT-AG signal is present.

**Figure S9. Top 5 most abundant circRNA candidates solely identified by CIRC or find\_circ.** X-axis represents the coordinates on the reference genome; y-axis represents the sequencing depth.

**Figure S10. Comparison of circRNA identification from four cell types between CIRC and the algorithm adopted in Memczak, et al.** (A) Overlap between the circRNAs identified by both algorithms. (B) The most abundant 10 candidates identified by Memczak, et al but not by CIRC are listed in the table. They can be mainly divided into two groups: One group of candidates seem to be false positives due to multiple mapping of a segment of a read to identical regions, while the other group of candidates are not supported by PEM. (C) An example shows the wrong mapping of one segment to repetitive regions. (D) An example shows the falsely discovered circRNA that is rejected by PEM.

**Figure S11. Comparison of circRNA identification from human and mouse between CIRC and the algorithm adopted in Guo, et al.**

(A) Overlap between the circRNAs identified in human cell types by both algorithms (Guo, et al: 39 cell types [15]; CIRC: 15 cell types, see Methods). (B) Overlap between the circRNAs identified in mouse data sets by both algorithms (Guo, et al: 18 data sets [15]; CIRC: 11 data sets, see Methods). (C-D) Two examples show the erroneous mapping of one segment to repetitive regions. (E) Among 279 candidates

identified by Guo, et al but not by CIRI, 42 have identical colinear exons and were filtered out by CIRI considering their mapping information.

**Figure S12. Expressions of top 50 abundant circRNAs identified by CIRI in 15 cell types.** The expression of a specific circRNA type is represented by count of junction reads normalized by total sequencing amount in each cell. The normalized junction read counts is proportional to area of corresponding bubble. The color of bubbles corresponds to category of cell type: red represents cancer cells; blue and green represent non-cancer cells; red and blue colors ranging from darkness to lightness represent endodermal, mesodermal and ectodermal cells, respectively; green color represents the only pluripotent cell type H1-hESC; black color represents average expression in cell types where a circRNA expresses. Y-axis: top 50 most abundant circRNAs locating in exonic, intronic and intergenic regions are marked in black, blue and red, respectively.

**Figure S13. Running time of CIRI on different data sets.**

**Figure S14. Performance evaluation of CIRI's filters on both circRNAs and chimeric RNAs.** (A) Chimeric RNA sequences which are split-aligned to different strands can be classified into two categories according to their mapping signatures on the reference genome; (B) The efficiency of CIRI's filters on removing false positives when detecting circRNAs and chimeric RNAs from the HeLa cell transcriptome data. Y-axis represents the number of remaining candidates in each filtering step.

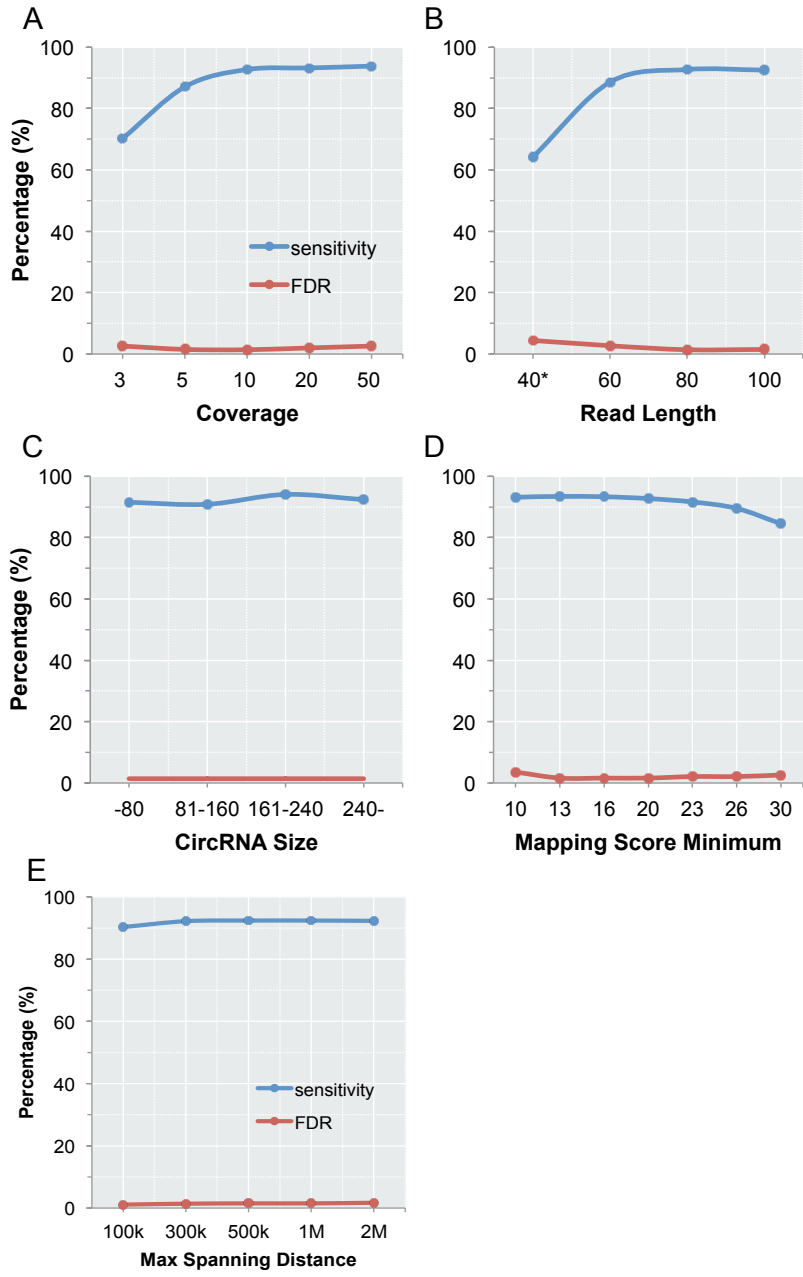

Suppl. Figure 1

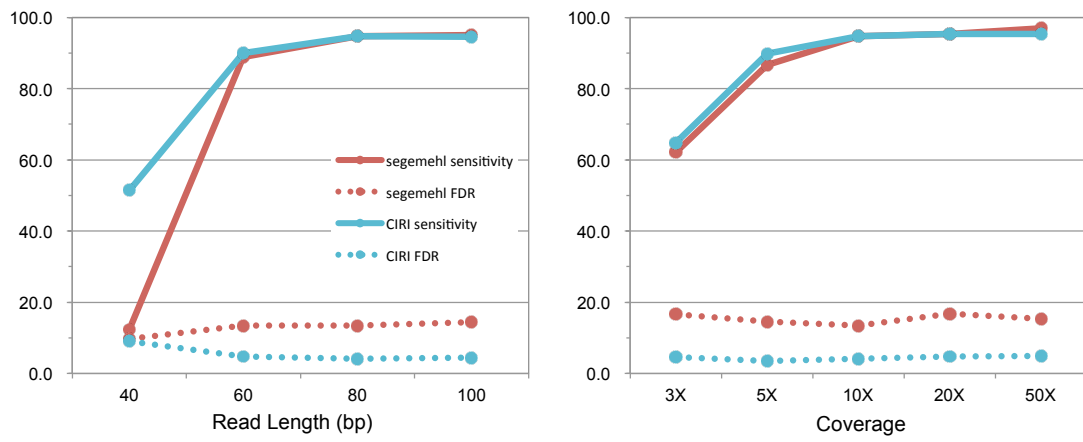

Suppl. Figure 2



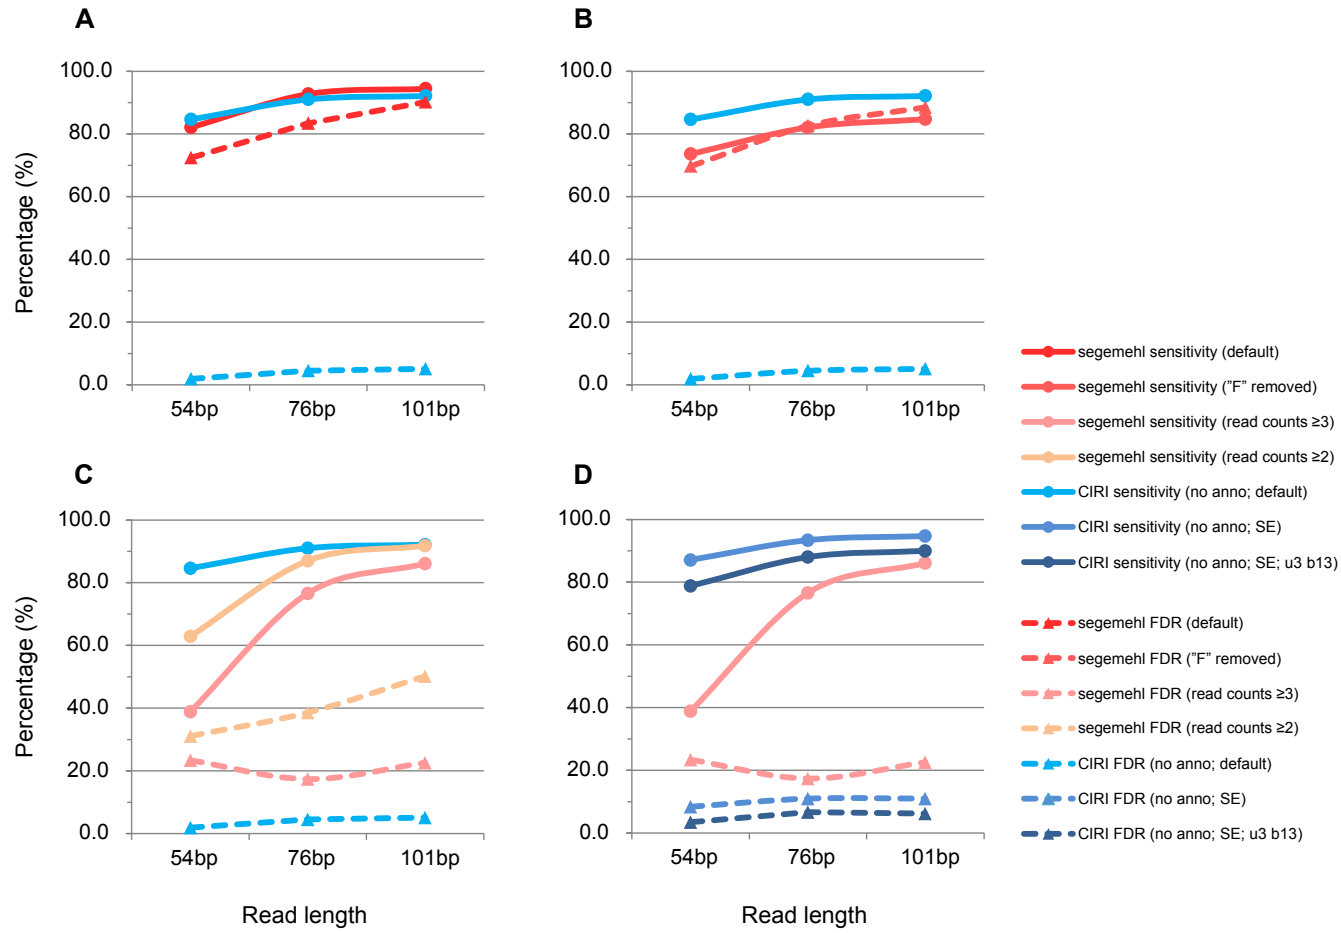

Suppl. Figure 3

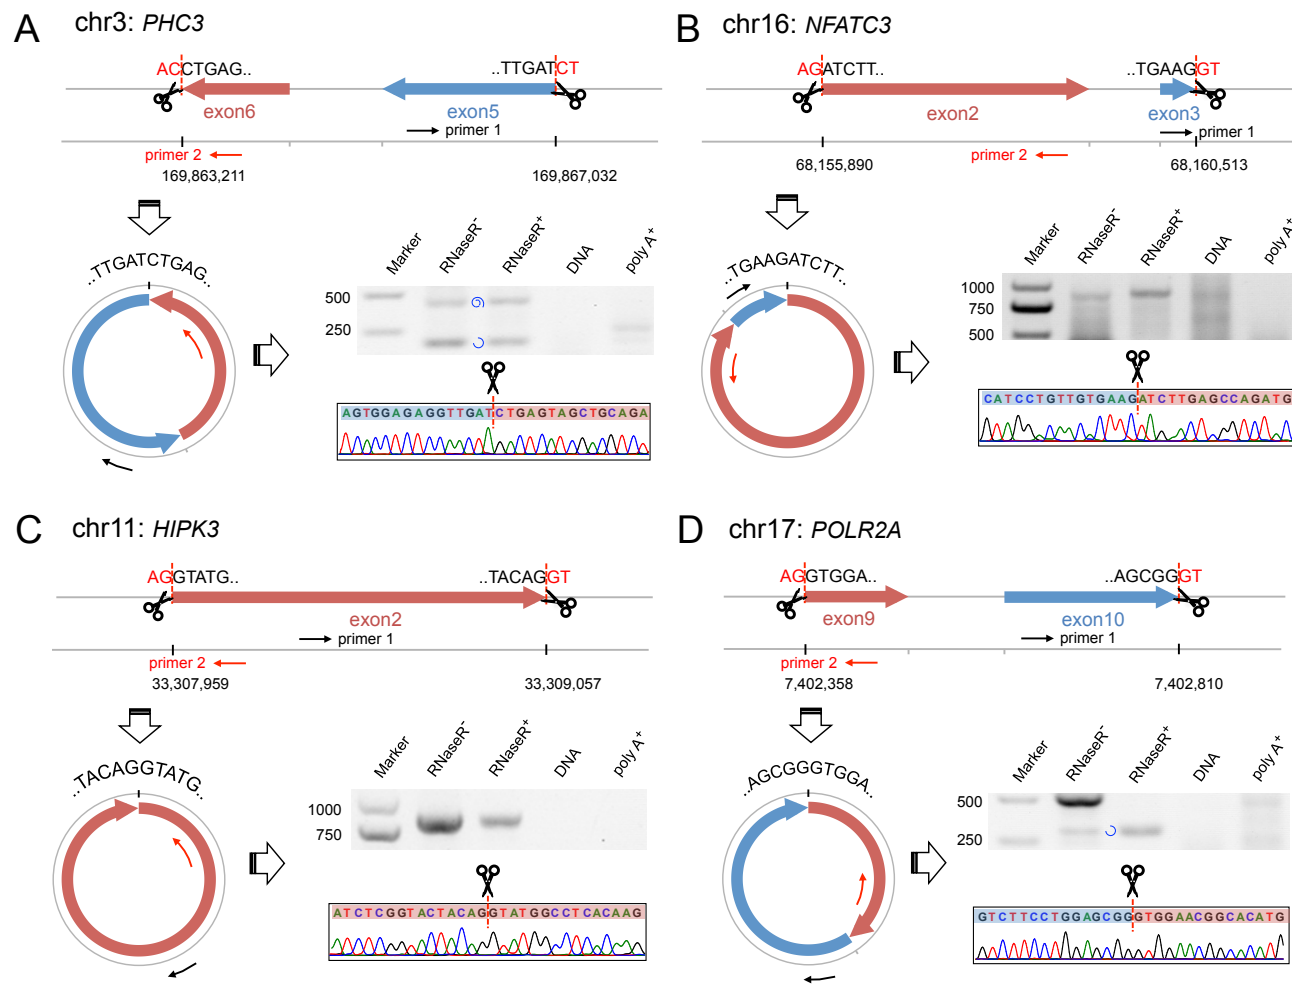

Suppl. Figure 4

**E** chr9: *FAM120A*

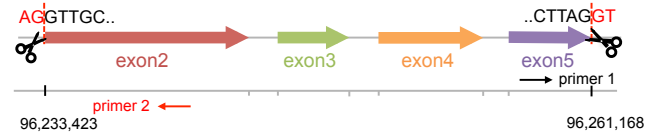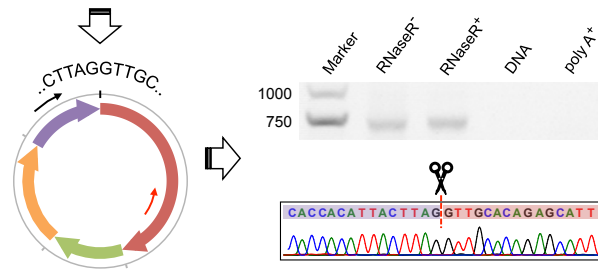

**F** chr10: *PDCD11*

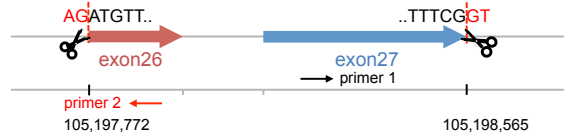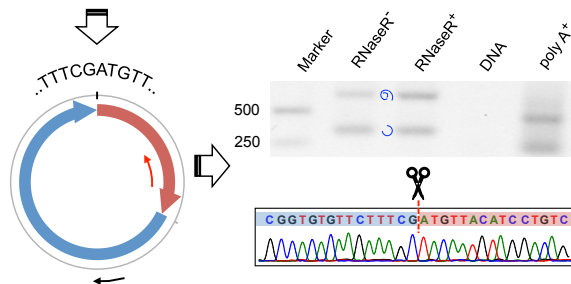

**G** chr2: *CRIM1*

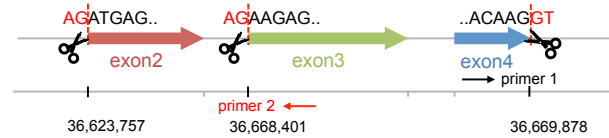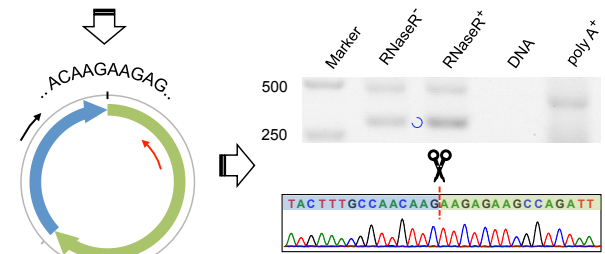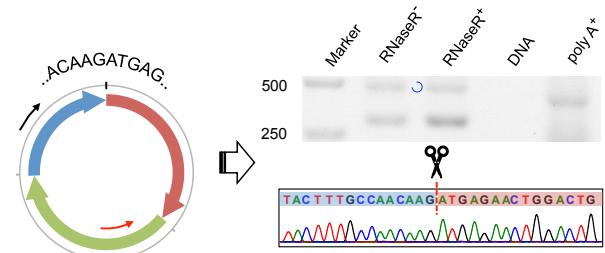

Suppl. Figure 4 – continued

H chr10: *SFMBT2*

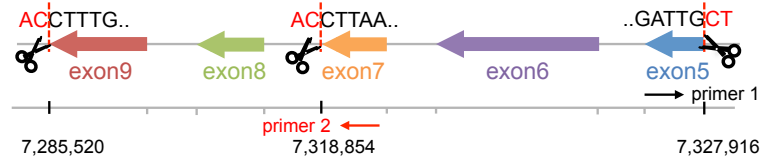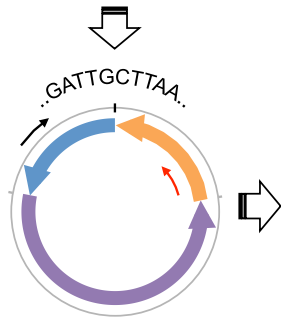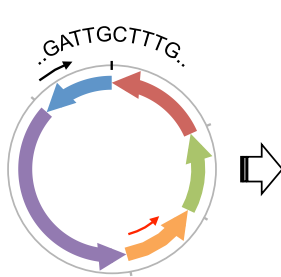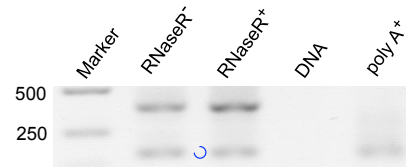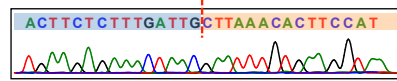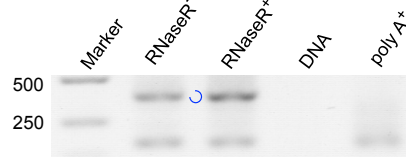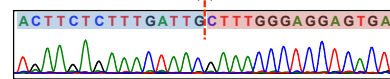

I chr16: *BANP*

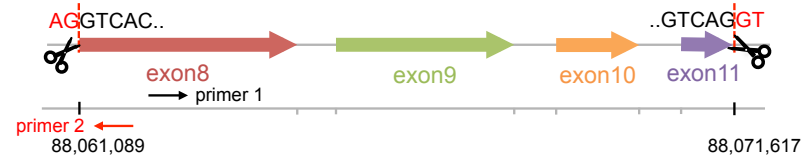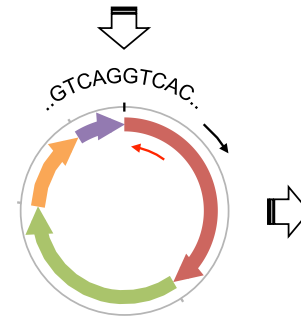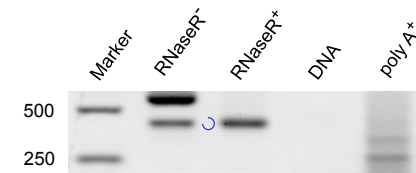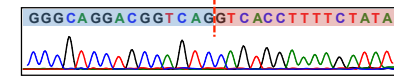

Suppl. Figure 4 – continued

J chr1: MAN1A2

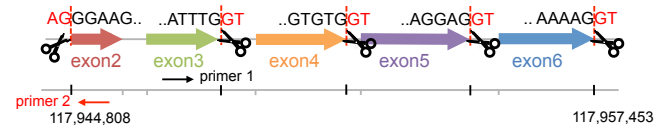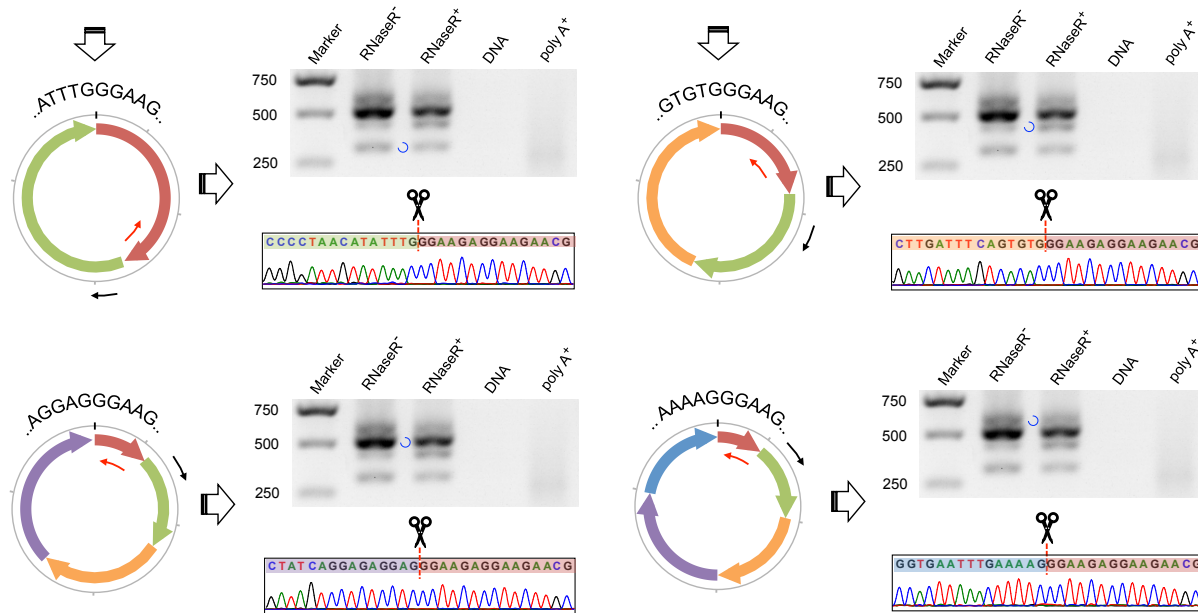

Suppl. Figure 4 – continued

**K** chr2: *ANKRD36BP2*

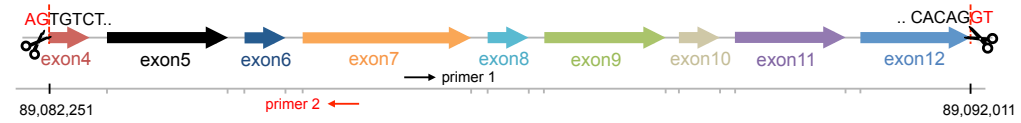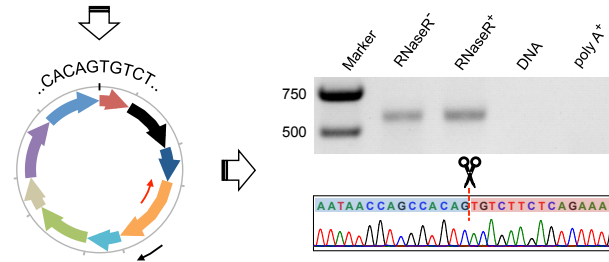

**L** chr3: *RSRC1*

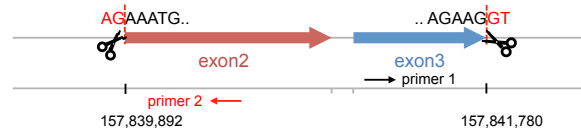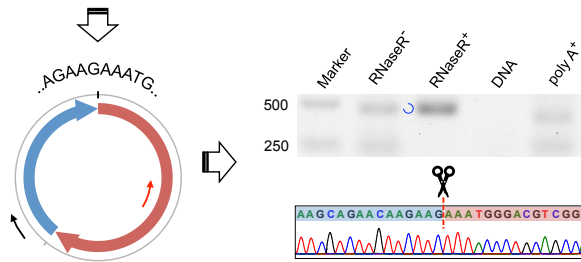

**M** chr2: *EXOC6B*

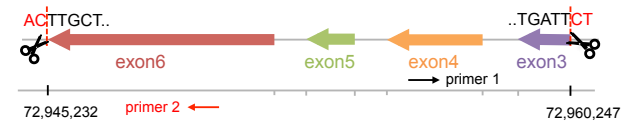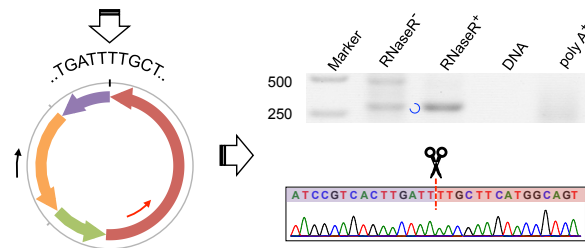

Suppl. Figure 4 – continued

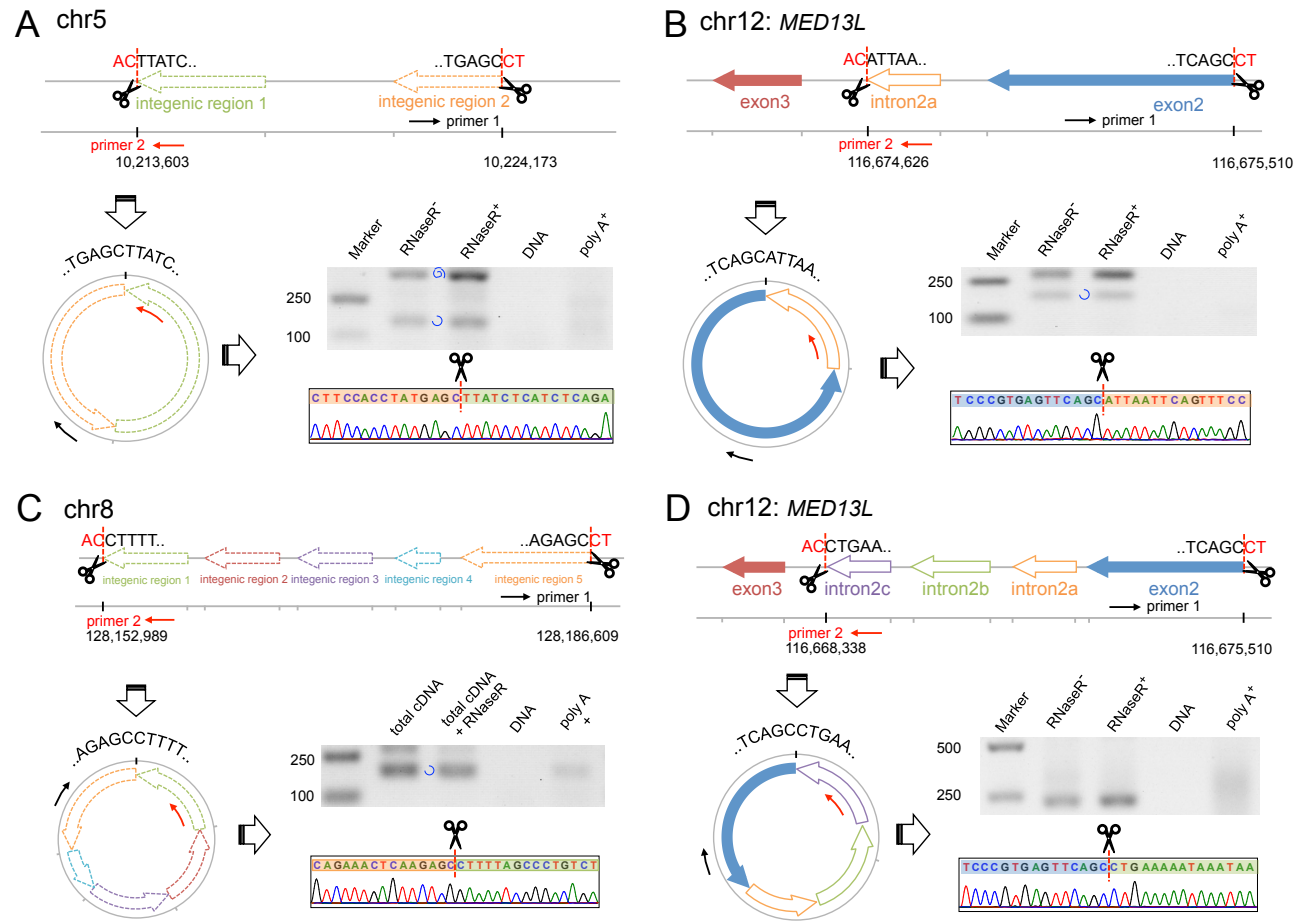

Suppl. Figure 5

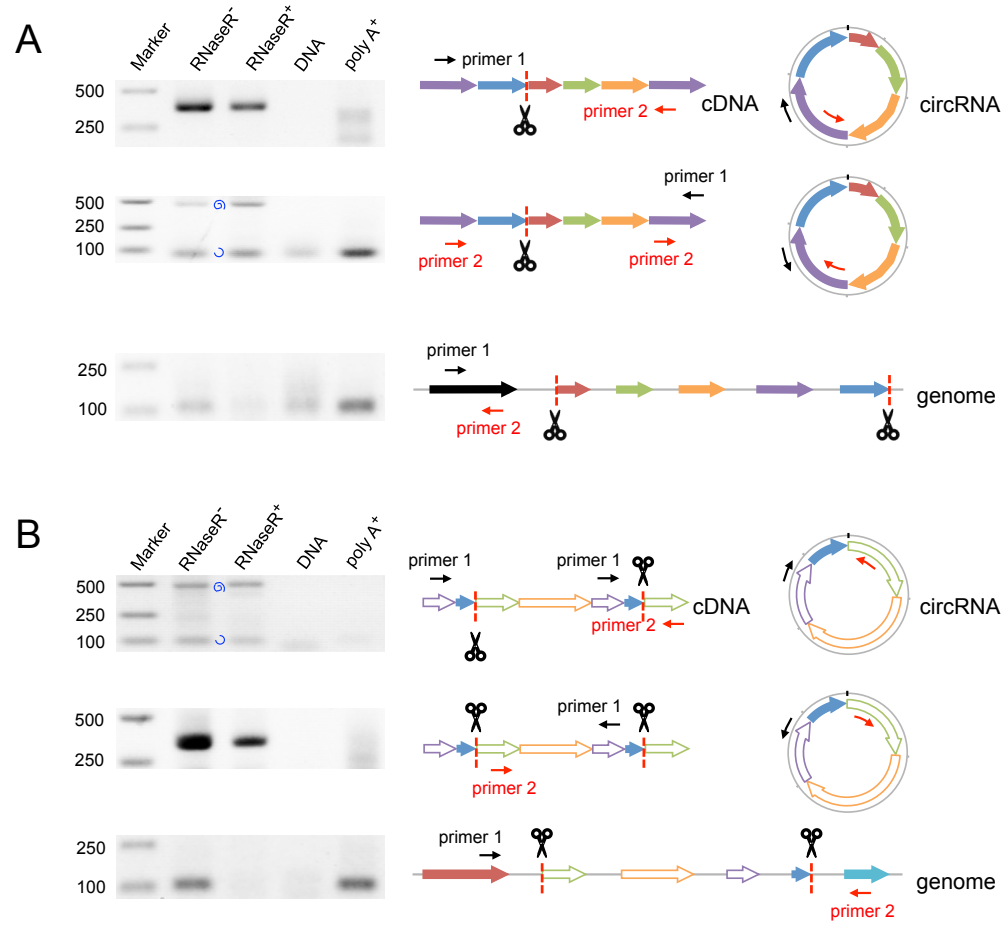

Suppl. Figure 6





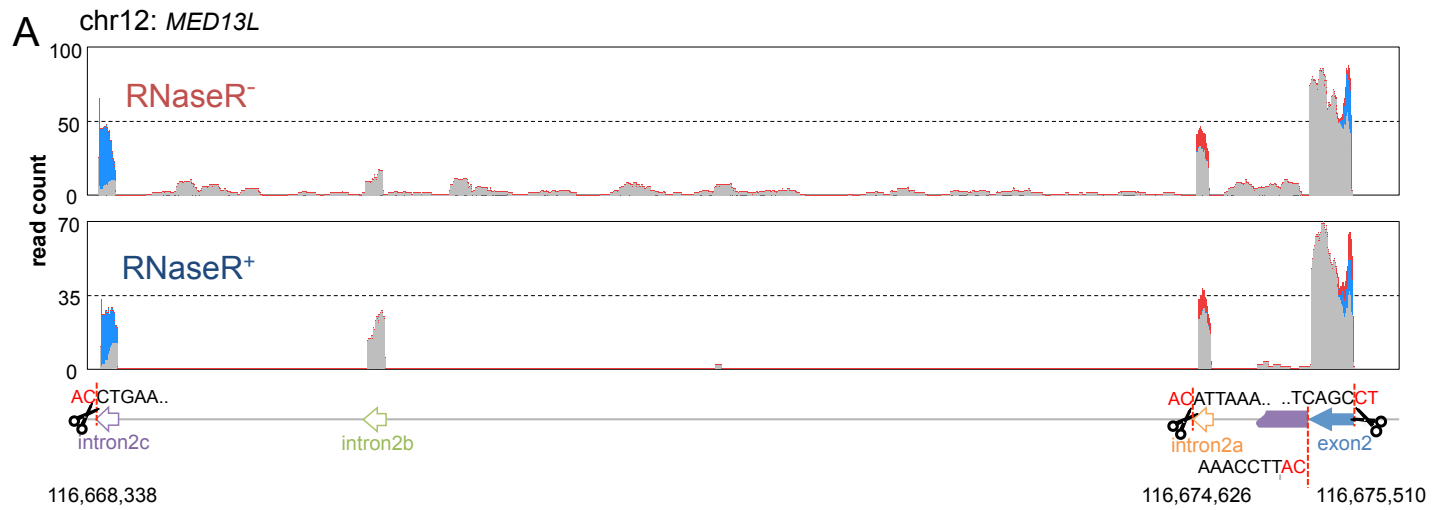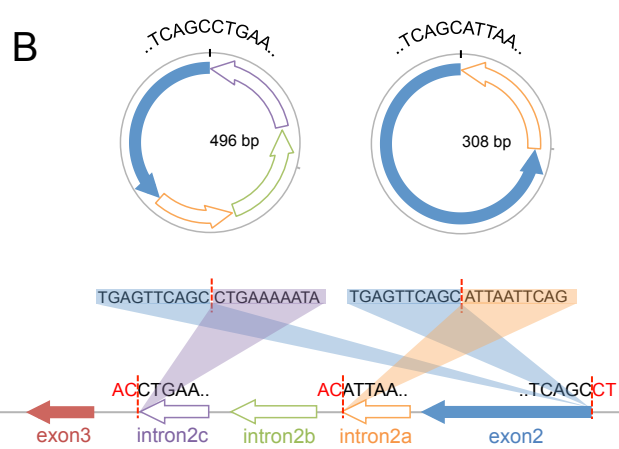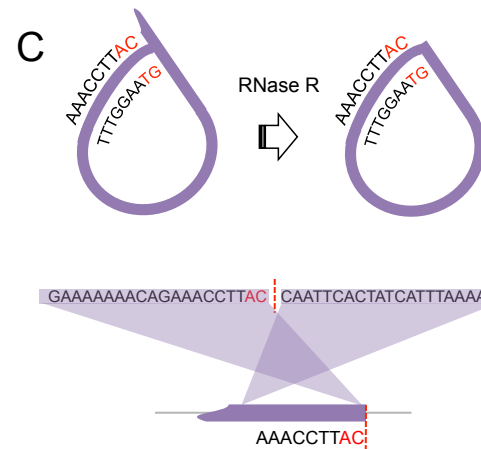

Suppl. Figure 8

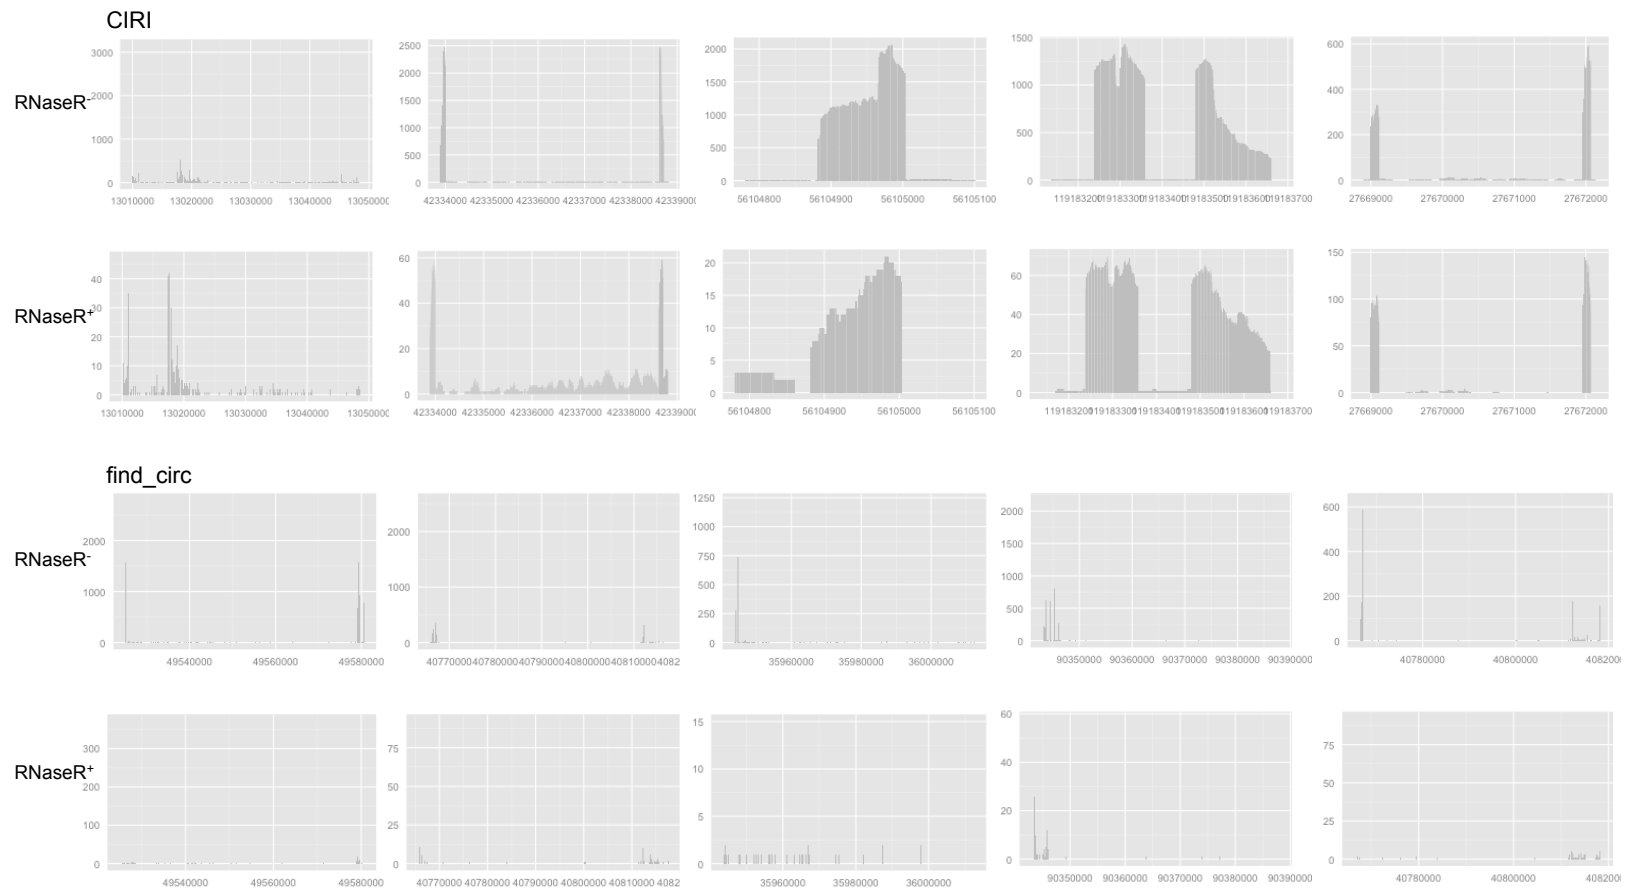

**Suppl. Figure 9**

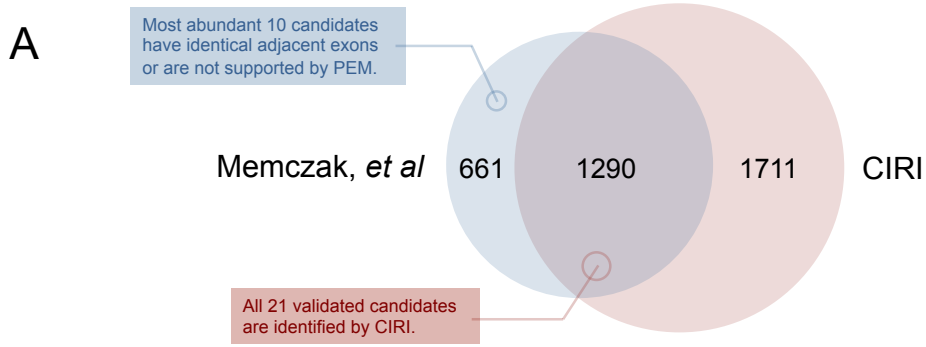

**B**

| chr   | Start     | End       | Name            | Score | Unique | Questionable            |
|-------|-----------|-----------|-----------------|-------|--------|-------------------------|
| chr12 | 49525080  | 49580616  | hsa_circ_002179 | 2842  | 446    | identical colinear exon |
| chr14 | 20811436  | 20811534  | hsa_circ_002178 | 1400  | 214    | not supported by PEM    |
| chr22 | 29784412  | 29819177  | hsa_circ_002177 | 226   | 53     | identical colinear exon |
| chr14 | 106091232 | 106109862 | hsa_circ_002174 | 106   | 32     | identical colinear exon |
| chr19 | 45419446  | 45430290  | hsa_circ_002169 | 83    | 21     | identical colinear exon |
| chr14 | 20811404  | 20811554  | hsa_circ_000167 | 80    | 25     | not supported by PEM    |
| chr7  | 141759655 | 141785761 | hsa_circ_002166 | 75    | 31     | identical colinear exon |
| chr6  | 32489734  | 32551938  | hsa_circ_002165 | 74    | 19     | identical colinear exon |
| chr14 | 106208677 | 106236323 | hsa_circ_002164 | 73    | 27     | not supported by PEM    |
| chr2  | 231223678 | 231307814 | hsa_circ_002162 | 63    | 25     | not supported by PEM    |

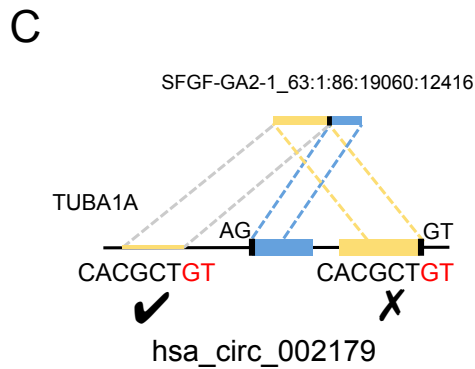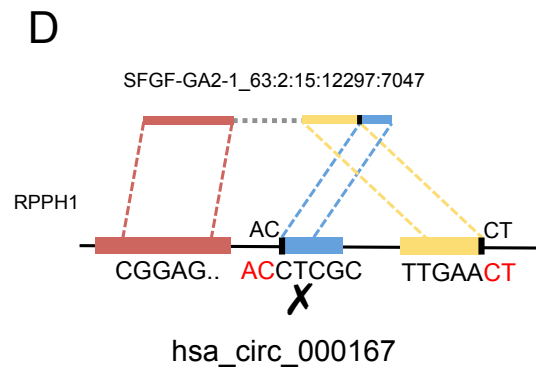

Suppl. Figure 10

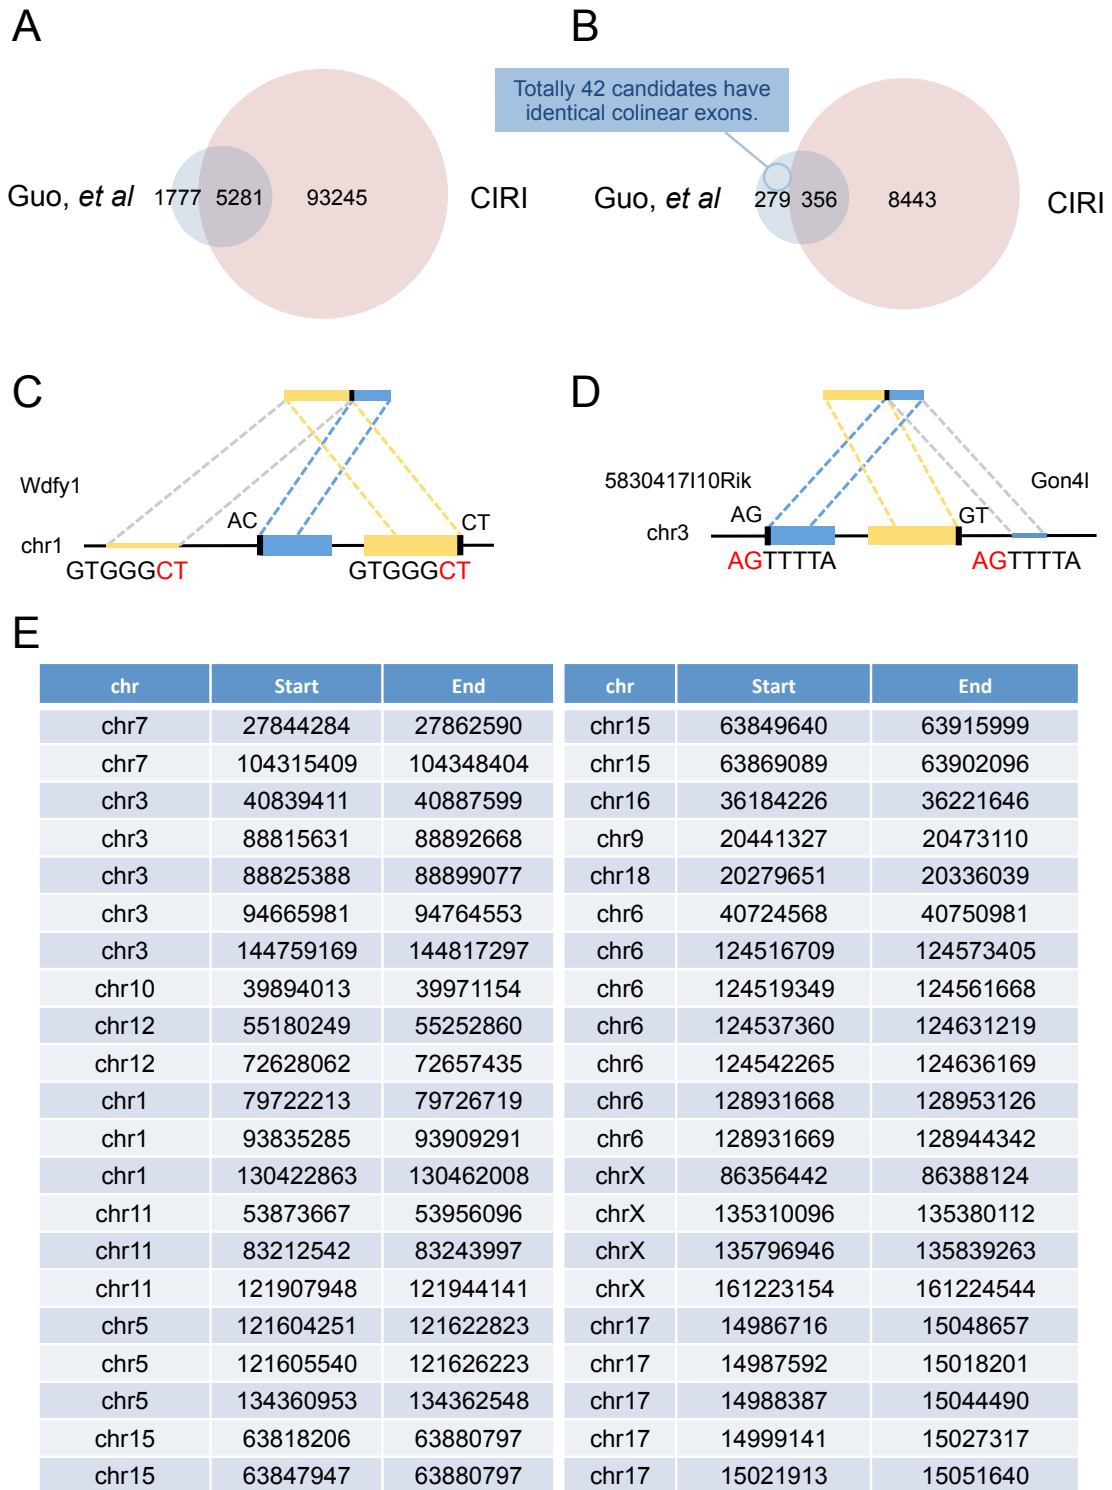

Suppl. Figure 11

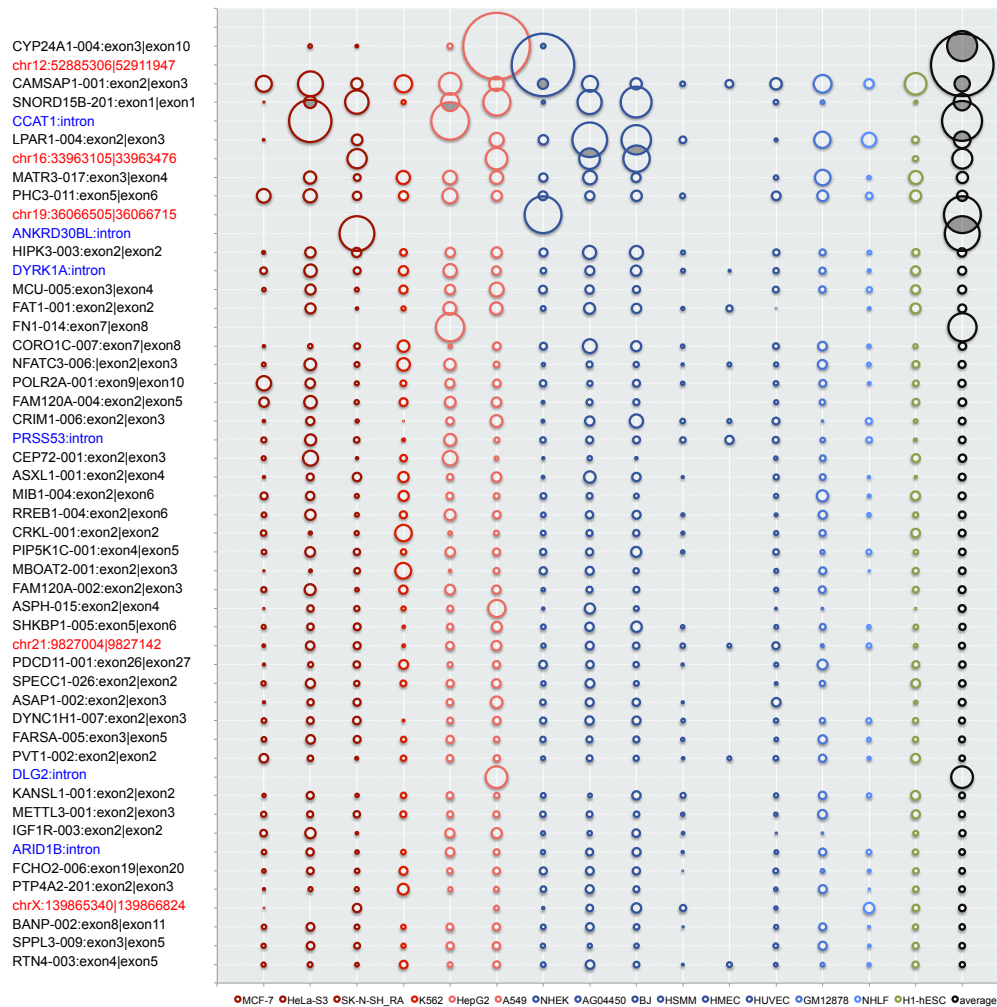

Suppl. Figure 12

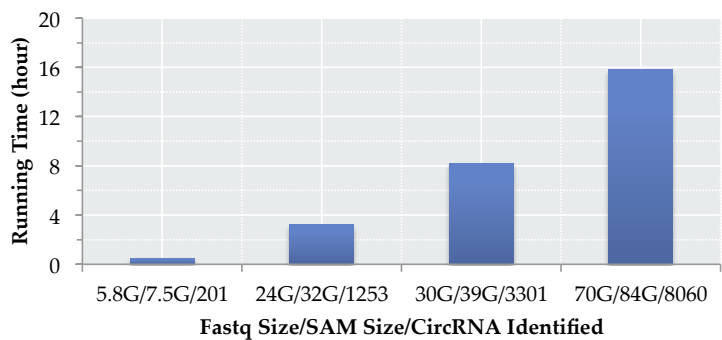

Suppl. Figure 13

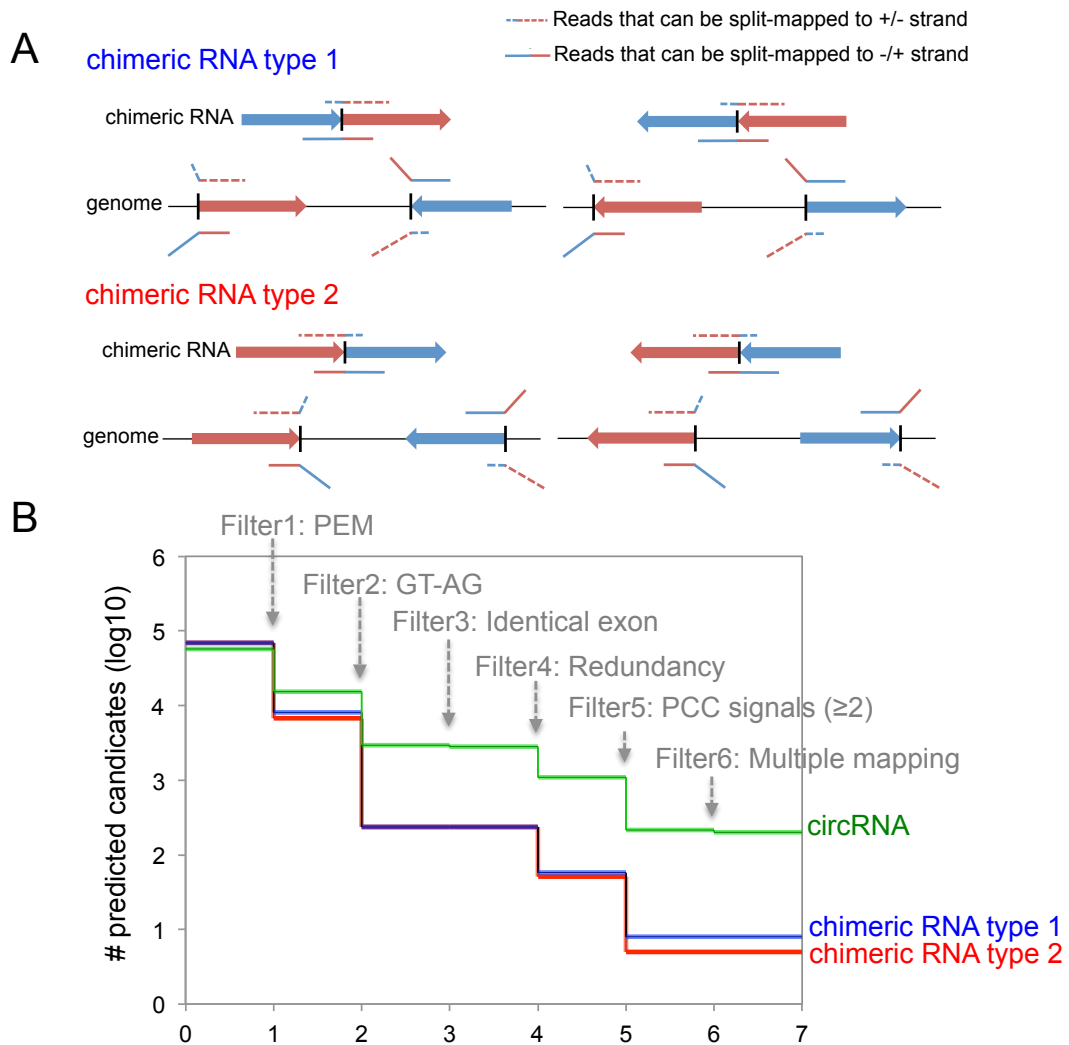

Suppl. Figure 14
